# Supplementary material for: A responsive cascade drug delivery scaffold adapted to the therapeutic time window for peripheral nerve injury repair
Source: Royal Society of Chemistry journal article supplement (doi:10.1039/d3mh01511d), 2023-11-30
Supplement: d3mh01511d1.pdf [file d3mh01511d1.pdf]

**Supplementary information**

**A responsive cascade drug delivery scaffold adapted to the therapeutic time window for peripheral nerve injury repair**

Yizhu Shan <sup>‡abc</sup>, Lingling Xu <sup>‡d</sup>, Xi Cui <sup>ac</sup>, Engui Wang <sup>a</sup>, Fengying Jiang <sup>ae</sup>, Jiaxuan Li <sup>a</sup>, Han Ouyang <sup>c</sup>, Tailang Yin <sup>f</sup>, Hongqing Feng <sup>\*ac</sup>, Dan Luo <sup>\*ac</sup>, Yan Zhang <sup>\*b</sup>, Zhou Li <sup>\*ac</sup>

<sup>a</sup> Beijing Institute of Nanoenergy and Nanosystems, Chinese Academy of Sciences, Beijing 100083, China

<sup>b</sup> Department of Clinical Laboratory, Renmin Hospital of Wuhan University, Wuhan 430060, China

<sup>c</sup> School of Nanoscience and Engineering, Chinese Academy of Sciences, Beijing 100049, China

<sup>d</sup> CAS Key Laboratory for Biomedical Effects of Nanomaterials and Nanosafety & CAS Center for Excellence in Nanoscience, National Center for Nanoscience and Technology of China, Beijing 100190, China

<sup>e</sup> Center on Nanoenergy Research, School of Physical Science and Technology, Guangxi University, Nanning 530004, China

<sup>f</sup> Reproductive Medicine Center, Renmin Hospital of Wuhan University, Wuhan 430060, China

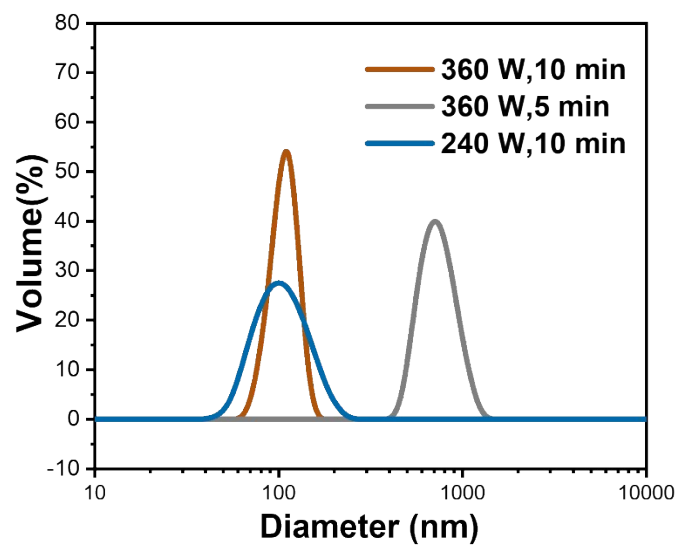

**Fig. S1.** Size distribution of PLGA nanoparticles prepared under different ultrasonication intensity and duration.

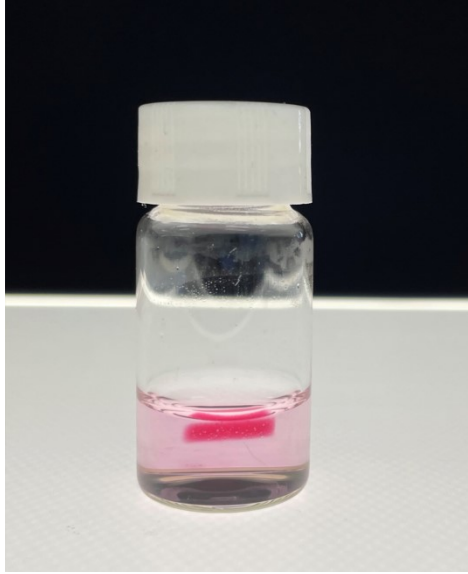

**Fig. S2.** The photograph of calcium cross-linked alginate hydrogel loaded with VB<sub>12</sub> (pink) and NGF.

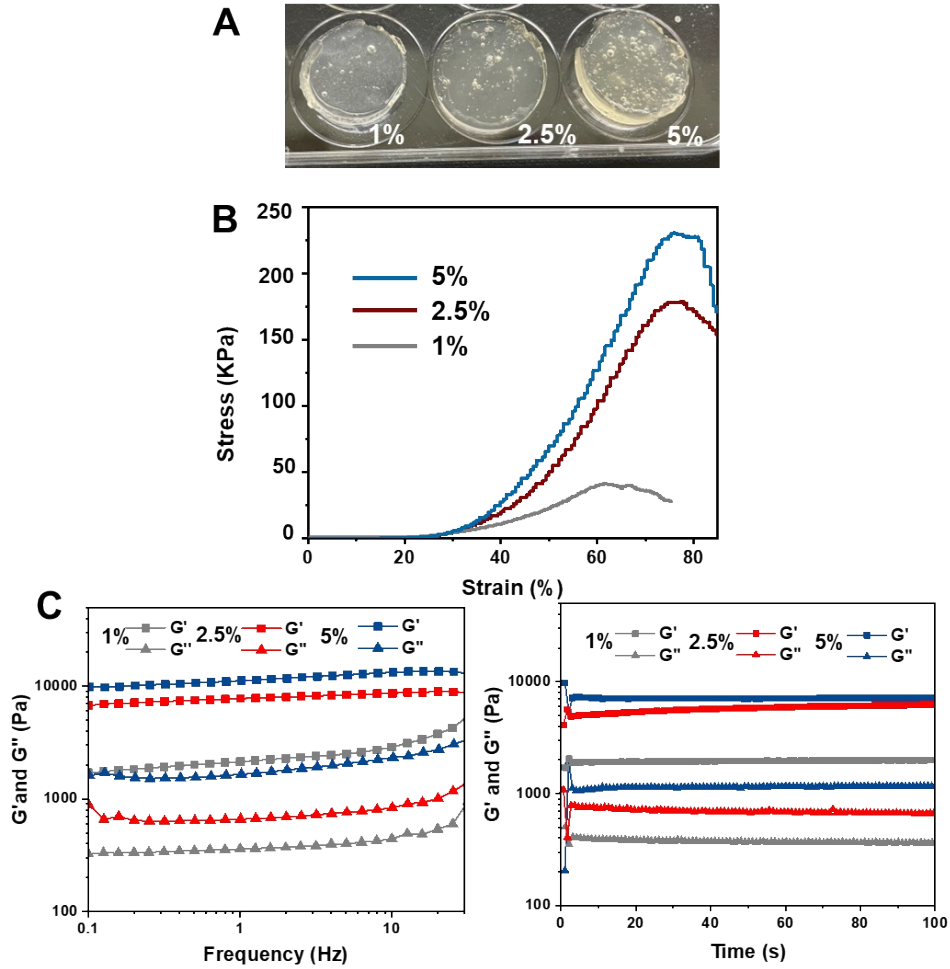

**Fig. S3.** (A) The photograph of calcium cross-linked alginate hydrogel with 1%, 2.5%, and 5% concentration of alginate. (B) The stress-strain curve of each concentration of hydrogel. (C) Rheological characterizations of alginate hydrogels with different concentration.

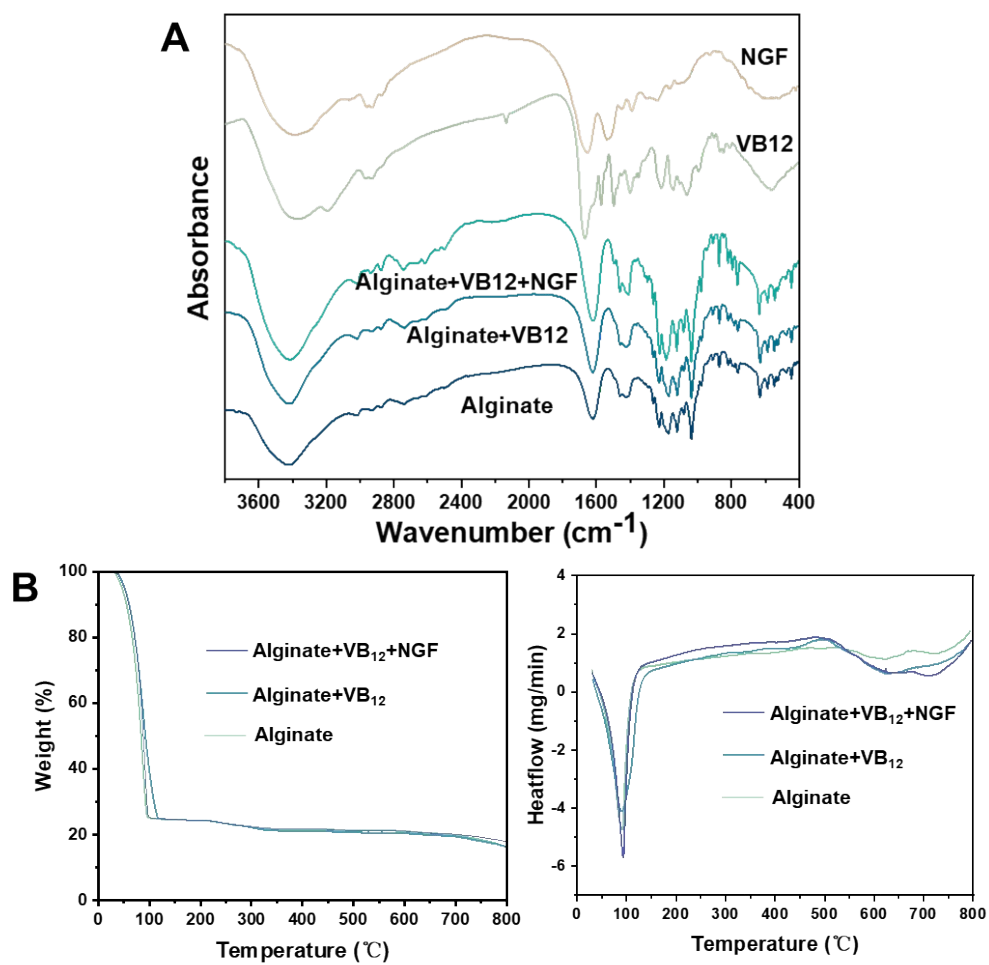

**Fig. S4.** A. The result of FTIR test of alginate, alginate + VB<sub>12</sub>, alginate + VB<sub>12</sub> +NGF, NGF and VB<sub>12</sub>. B. TG-DSC test of alginate, alginate + VB<sub>12</sub>, alginate + VB<sub>12</sub> +NGF.

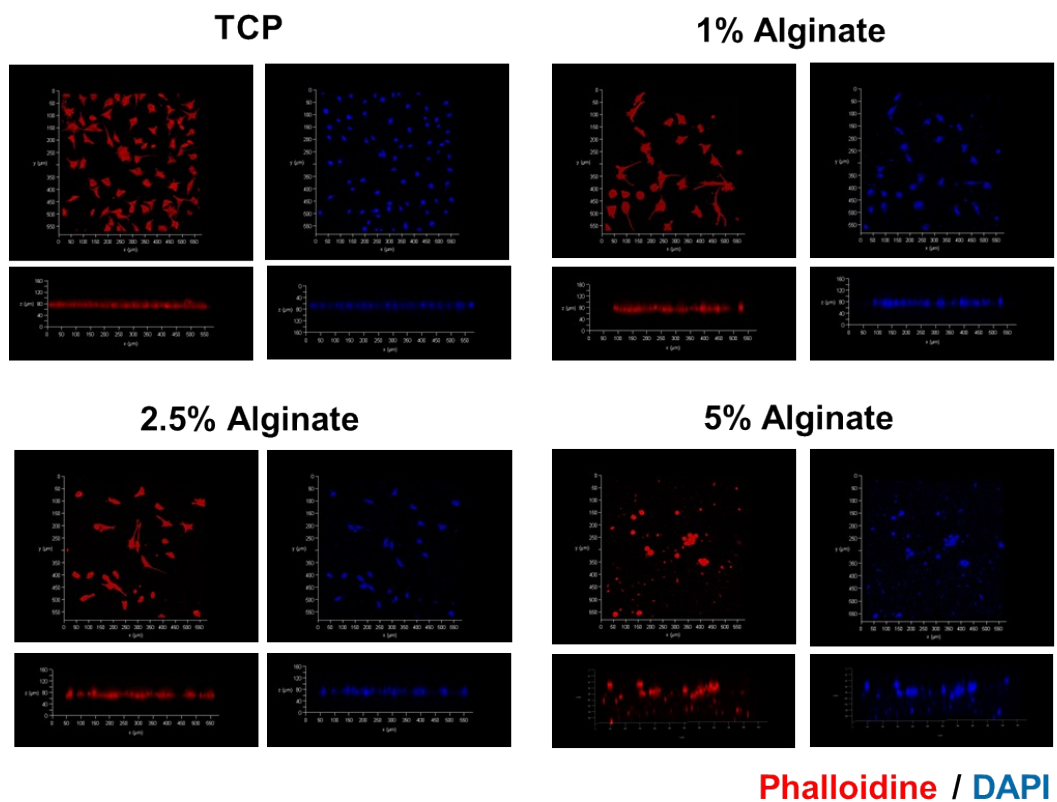

**Fig. S5.** Three-dimensional cytoskeleton (red) and DAPI (blue) staining photographs of PC12 cells cultured on TCP and UCDS with 1%, 2.5% and 5% concentration of hydrogel.

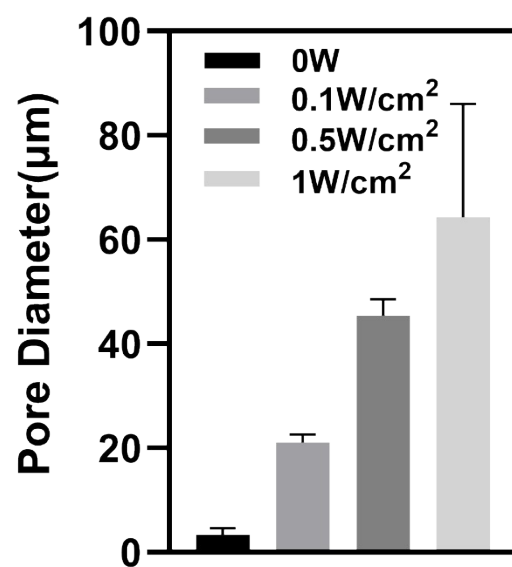

**Fig. S6.** Statistical data of the pore diameter of the ultrasound-responsive calcium cross-linked alginate hydrogel with no stimulation, 0.1W/cm<sup>2</sup>, 0.5W/cm<sup>2</sup> and 1W/cm<sup>2</sup> intensity of stimulation.

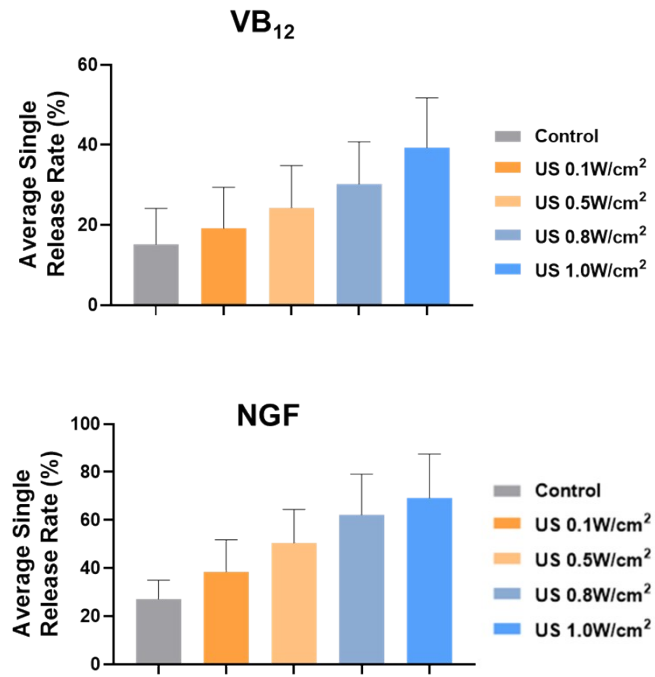

**Fig. S7.** The statistical data of the single release amount of VB<sub>12</sub> and NGF in the first three days under different intensities of ultrasonic stimulation.



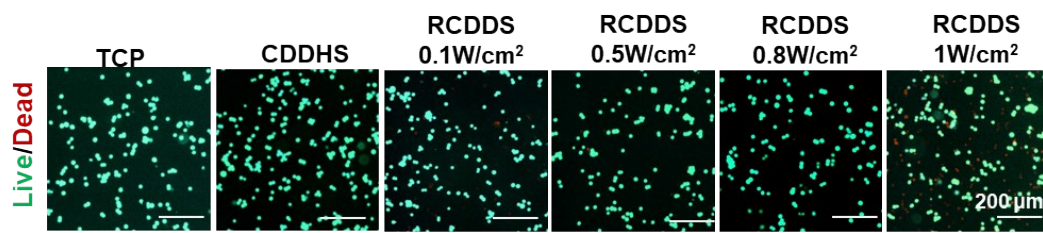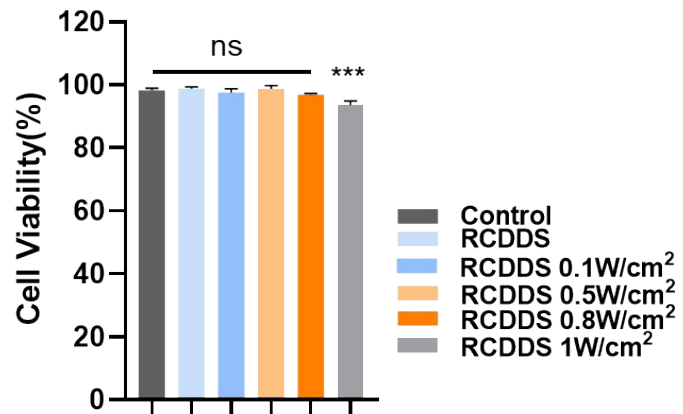

**Fig. S8.** Results of the representative photo and quantitative analysis of live/dead assay (n = 3) of different groups.

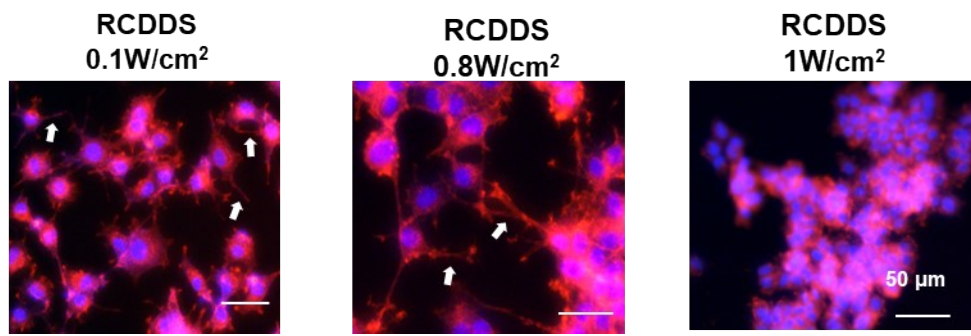

**Fig. S9.** Representative images of cytoskeleton staining of PC12 cells of RCDDS + 0.1W/cm<sup>2</sup>US, RCDDS + 0.8W/cm<sup>2</sup>US and RCDDS + 1W/cm<sup>2</sup>US.

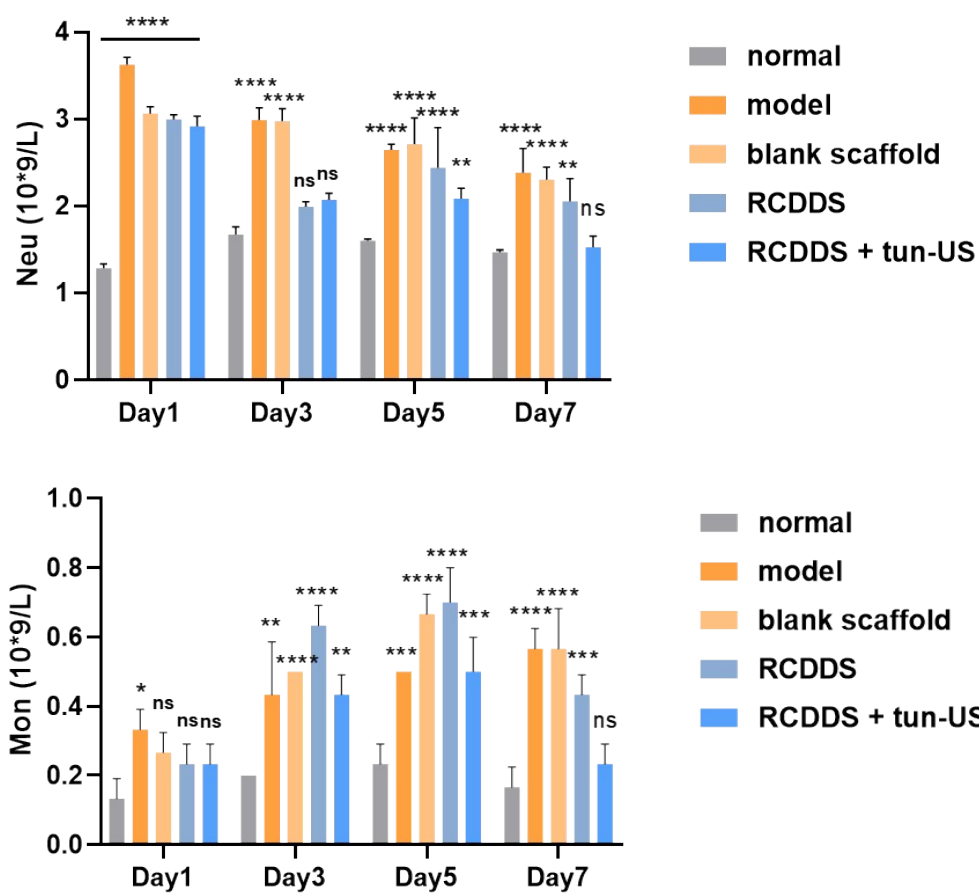

**Fig. S10.** Blood routine examination results of neutrophil and monocytes of the rats in five different groups (normal, model, blank scaffold, RCDDS and RCDDS + tun-US) at day1, 3, 5 and 7 after nerve injury (n = 3).

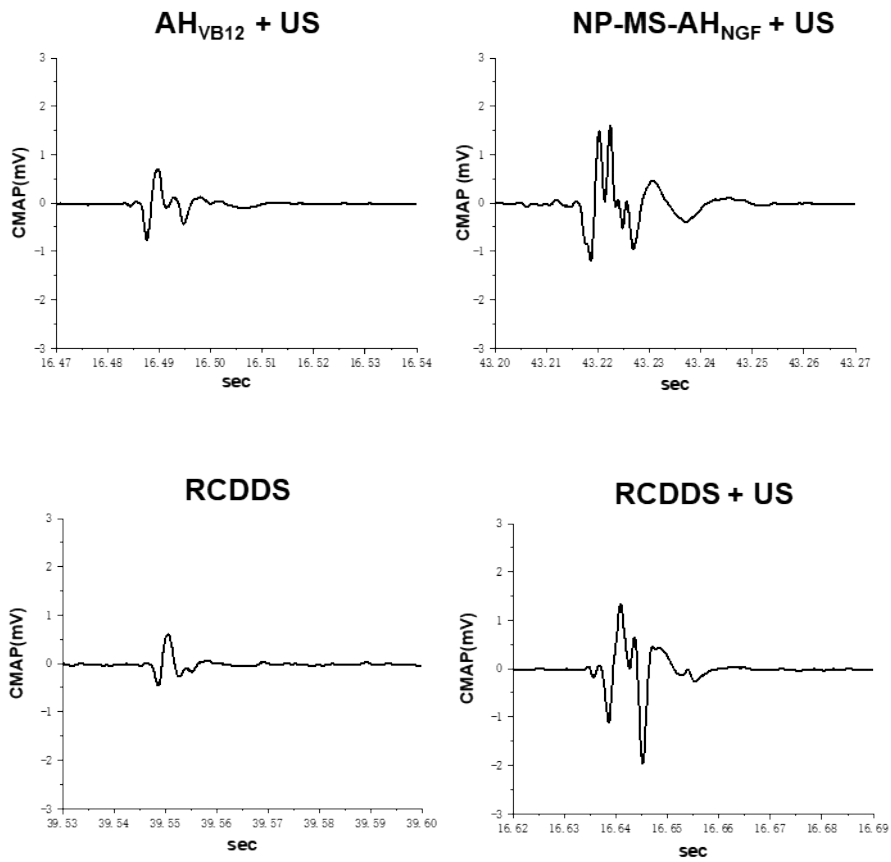

**Fig. S11.** Representative CMAP waveform of the rats from AH<sub>VB12</sub> + US group and NP-MS-AH<sub>NGF</sub> + US group, RCDDS groups and RCDDS + US group.
